# Supplementary material
Source: Springer Nature journal article supplement (https://www.springermedizin.de/resource/supplementary/12884_2009_295_MOESM5_ESM.pdf/9457396)
Supplement: MOESM5 [file 9457396]

# खतराका लक्षणहरू

आमा र शिशुलाई तलका कुनैपनि खतराका लक्षणहरू देखिएमा तुरुन्त स्वास्थ्य संस्था लैजानुपर्छ

## गर्भावस्थामा देखा पर्न सक्ने खतराका लक्षण

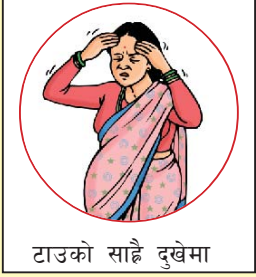

टाउको साह्रै दुखेमा

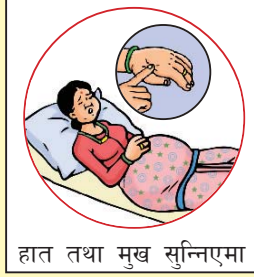

हात तथा मुख सुन्निएमा

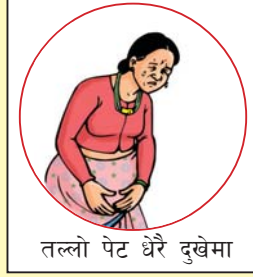

तल्लो पेट धेरै दुखेमा

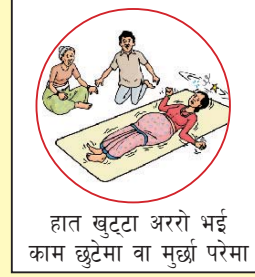

हात खुट्टा अररो भई काम छुटेमा वा मुर्छा परेमा

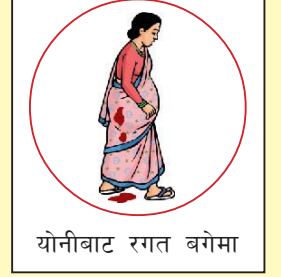

योनीबाट रगत बगेमा

## बच्चा जन्माउने बेलामा देखा पर्न सक्ने खतराका लक्षणहरू

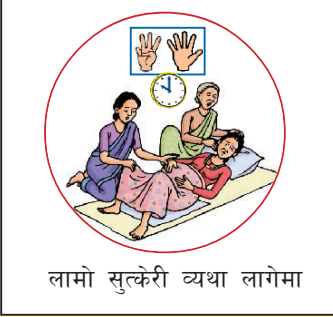

लामो सुत्केरी व्यथा लागेमा

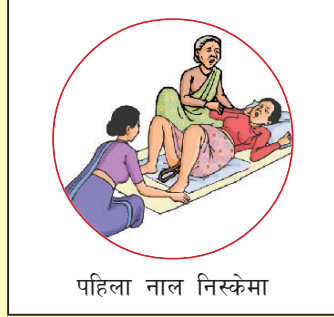

पहिला नाल निस्केमा

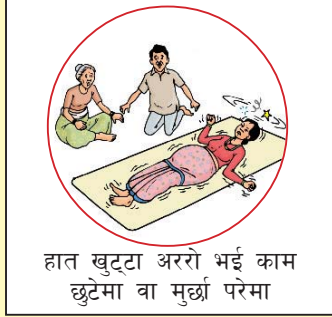

हात खुट्टा अररो भई काम छुटेमा वा मुर्छा परेमा

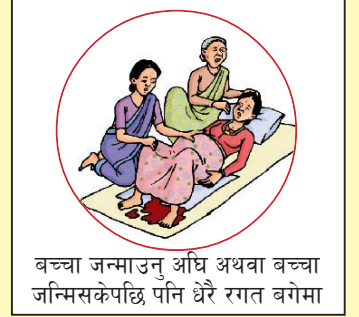

बच्चा जन्माउनु अघि अथवा बच्चा जन्मिसकेपछि पनि धेरै रगत बगेमा

## सुत्केरी अवस्थामा देखा पर्न सक्ने खतराका लक्षणहरू

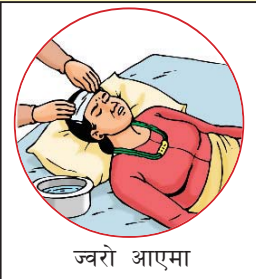

ज्वरो आएमा

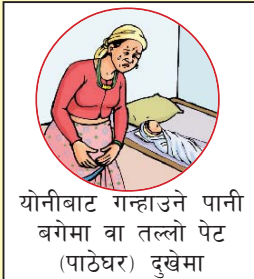

योनीबाट गन्हाउने पानी बगेमा वा तल्लो पेट (पाठेघर) दुखेमा

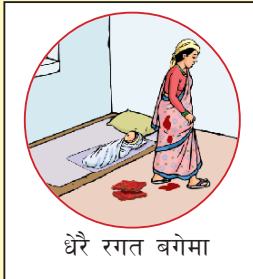

धेरै रगत बगेमा

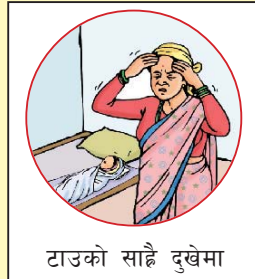

टाउको साह्रै दुखेमा

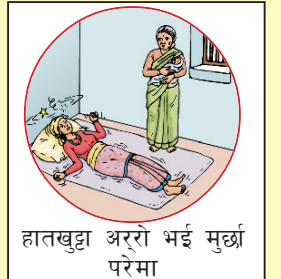

हातखुट्टा अररो भई मुर्छा परेमा

## नवशिशुमा देखिने संक्रमण(खतरा)का लक्षणहरू

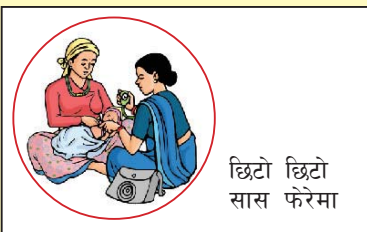

छिटो छिटो सास फेरेमा

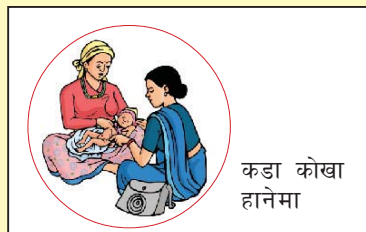

कडा कोखा हानेमा

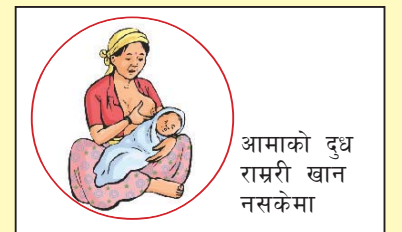

आमाको दुध राम्ररी खान नसकेमा

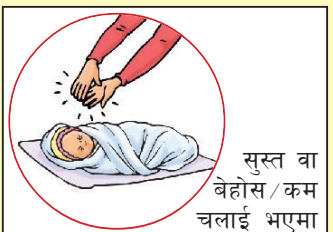

सुस्त वा बेहोस/कम चलाई भएमा

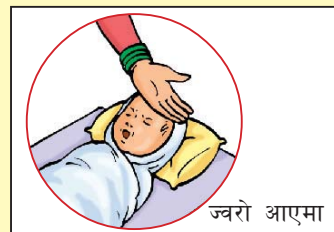

ज्वरो आएमा

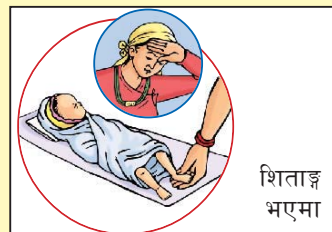

शिताङ्ग भएमा

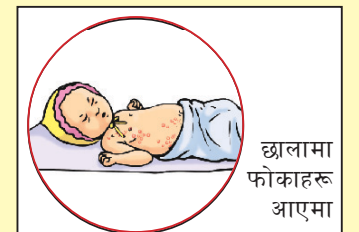

छालामा फोकाहरू आएमा
